# Supplementary material for: Robustness analysis of a constraint-based metabolic model links cell growth and proteomics of Thermoanaerobacter tengcongensis under temperature perturbation
Source: Royal Society of Chemistry journal article supplement (doi:10.1039/c3mb25278g), 2013-01-18
Supplement: c3mb25278g.pdf [file c3mb25278g.pdf]

**Supplemental Table 1** List of reactions whose catalyzing enzymes abundance changed between 75 and 55 °C for the central metabolic network of *T. tengcongensis*

| Reaction name                                       | Reaction description               | Reaction                                                          | Genes involved in the reaction                                                       | Enzyme                                       | detected differential protein | data derivation |
|-----------------------------------------------------|------------------------------------|-------------------------------------------------------------------|--------------------------------------------------------------------------------------|----------------------------------------------|-------------------------------|-----------------|
| <b>protein abundance decreasing from 75 to 55°C</b> |                                    |                                                                   |                                                                                      |                                              |                               |                 |
| PPS                                                 | phosphoenolpyruvate synthase       | atp[c] + h2o[c] + pyr[c] -> amp[c] + 2 h[c] + pep[c] + pi[c]      | TTE0981                                                                              | 2.7.9.1                                      | TTE0981                       | 2DE             |
| PTAr                                                | phosphotransacetylase              | accoa[c] + pi[c] <=> actp[c] + coa[c]                             | TTE1482                                                                              | 2.3.1.8                                      | TTE1482                       | 2DE             |
| THDPS                                               | tetrahydrodipicolinate succinylase | h2o[c] + succoa[c] + thdp[c] -> coa[c] + sl2a6o[c]                | TTE0830                                                                              | 2.3.1.117                                    | TTE0830                       | 2DE             |
| DHDPS                                               | dihydrodipicolinate synthase       | aspsa[c] + pyr[c] -> 23dhdp[c] + 2 h2o[c] + h[c]                  | TTE0832                                                                              | 4.2.1.52                                     | TTE0832                       | 2DE and iTRAQ   |
| FBA                                                 | fructose bisphosphate aldolase     | fdp[c] <=> dhap[c] + g3p[c]                                       | TTE0137                                                                              | 4.1.2.13                                     | TTE0137                       | 2DE and iTRAQ   |
| ICDHyr                                              | isocitrate dehydrogenase NADP      | icit[c] + nadp[c] <=> akg[c] + co2[c] + nadph[c]                  | TTE0387                                                                              | 1.1.1.42                                     | TTE0387                       | iTRAQ           |
| GLYCL                                               | Glycine Cleavage System            | gly[c] + nad[c] + thf[c] <=> co2[c] + mlthf[c] + nadh[c] + nh4[c] | (TTE0293 and TTE0294 and TTE0296 and TTE0088 and TTE1674)                            | 1.4.4.2<br>and<br>2.1.2.10<br>and<br>1.8.1.4 | TTE1674                       | iTRAQ           |
| GLCabc                                              | D glucose transport via ABC system | atp[c] + glc_D[e] + h2o[c] -> adp[c] + glc_D[c] + h[c] + pi[c]    | ((TTE1829 and TTE1830 and TTE1831 and TTE1979) or (TTE0290 and TTE0291 and TTE0292)) |                                              | TTE1979                       | iTRAQ           |
| ADSL1r                                              | adenylsuccinate lyase              | dcamp[c] <=> amp[c] + fum[c]                                      | TTE1367                                                                              | 4.3.2.2                                      | TTE1367                       | iTRAQ           |

|                                                     |                                                                |                                                                                                                                       |                                                                                                                    |                            |                                             |                  |
|-----------------------------------------------------|----------------------------------------------------------------|---------------------------------------------------------------------------------------------------------------------------------------|--------------------------------------------------------------------------------------------------------------------|----------------------------|---------------------------------------------|------------------|
| ADSL2r                                              | adenylosuccinate lyase                                         | $25\text{aics}[c] \rightleftharpoons \text{aicar}[c] + \text{fum}[c]$                                                                 | TTE1367                                                                                                            | 4.3.2.2                    | TTE1367                                     | iTRAQ            |
| OAADC                                               | oxaloacetate decarboxylase                                     | $\text{oaa}[c] + \text{h}[c] \rightarrow \text{pyr}[c] + \text{co2}[c]$                                                               | (TTE0252 and (TTE1208 or TTE1336))                                                                                 | 4.1.1.3                    | TTE1336                                     | iTRAQ            |
| PRASCS                                              | phosphoribosylaminoimida<br>zolesuccinocarboxamide<br>synthase | $5\text{aizc}[c] + \text{asp\_L}[c] + \text{atp}[c] \rightleftharpoons 25\text{aics}[c] + \text{adp}[c] + \text{h}[c] + \text{pi}[c]$ | TTE0588                                                                                                            | 6.3.2.6                    | TTE0588                                     | iTRAQ            |
| <b>protein abundance increasing from 75 to 55°C</b> |                                                                |                                                                                                                                       |                                                                                                                    |                            |                                             |                  |
| ALADH                                               | alanine dehydrogenase                                          | $\text{ala\_L}[c] + \text{nad}[c] + \text{h2o}[c] \rightarrow \text{h}[c] + \text{pyr}[c] + \text{nh4}[c] + \text{nadh}[c]$           | TTE0161                                                                                                            | 1.4.1.1                    | TTE0161                                     | 2DE              |
| PGK                                                 | phosphoglycerate kinase                                        | $13\text{dpg}[c] + \text{adp}[c] \rightleftharpoons 3\text{pg}[c] + \text{atp}[c]$                                                    | TTE1761                                                                                                            | 2.7.2.3                    | TTE1761                                     | 2DE              |
| THRDr                                               | L threonine dehydrogenase                                      | $\text{nad}[c] + \text{thr\_L}[c] \rightleftharpoons 2\text{aobut}[c] + \text{h}[c] + \text{nadh}[c]$                                 | TTE2405                                                                                                            | 1.1.1.103                  | TTE2405                                     | 2DE and<br>iTRAQ |
| PFOR                                                | pyruvate ferredoxin<br>oxidoreductase                          | $\text{pyr}[c] + \text{coa}[c] + \text{fdxo}[c] \rightleftharpoons \text{co2}[c] + \text{fdxr}[c] + \text{h}[c] + \text{accoa}[c]$    | ((TTE0445 or TTE0961 or TTE2194) and<br>(TTE1211 or TTE1342))                                                      | 1.2.7.-                    | TTE1342,<br>TTE0961                         | 2DE and<br>iTRAQ |
| GLUSy                                               | glutamate synthase NADPH                                       | $\text{akg}[c] + \text{gln\_L}[c] + \text{h}[c] + \text{nadph}[c] \rightarrow 2 \text{glu\_L}[c] + \text{nadp}[c]$                    | (TTE0567 or TTE0693)                                                                                               | 1.4.1.13                   | TTE0567,<br>TTE0693                         | 2DE and<br>iTRAQ |
| FNORr                                               | ferredoxin-NADP reductase                                      | $\text{fdxr}[c] + \text{h}[c] + \text{nadp}[c] \rightleftharpoons \text{fdxo}[c] + \text{nadph}[c]$                                   | (TTE0566 or TTE0694)                                                                                               | 1.18.1.2                   | TTE0694                                     | iTRAQ            |
| ADHEr                                               | Acetaldehyde<br>dehydrogenase                                  | $\text{accoa}[c] + 2 \text{h}[c] + 2 \text{nadh}[c] \rightleftharpoons \text{coa}[c] + \text{etoh}[c] + 2 \text{nad}[c]$              | TTE0695                                                                                                            | 1.2.1.10<br>and<br>1.1.1.1 | TTE0695                                     | iTRAQ            |
| OFOR                                                | 2-ketoglutarate ferredoxin<br>oxidoreductase                   | $\text{akg}[c] + \text{coa}[c] + \text{fdxo}[c] \rightarrow \text{co2}[c] + \text{fdxr}[c] + \text{h}[c] + \text{succoa}[c]$          | (TTE0960 or TTE0961 or TTE1209 or<br>TTE1210 or TTE1340 or TTE1341 or<br>TTE1342 or TTE2198 or TTE2199)            | 1.2.7.3                    | TTE0960,<br>TTE0961                         | iTRAQ            |
| NADH1<br>1                                          | NADH dehydrogenase                                             | $3 \text{h}[c] + \text{nadh}[c] + \text{q}[c] \rightarrow 2 \text{h}[e] + \text{nad}[c] + \text{qh2}[c]$                              | (TTE0123 and TTE0124 and TTE0125<br>and TTE0127 and TTE0128 and<br>TTE0890 and TTE0893 and TTE0894<br>and TTE2486) | 1.6.5.3<br>and<br>1.6.99.3 | TTE0890,<br>TTE0893,<br>TTE0894,<br>TTE2486 | iTRAQ            |

|        |                                                                |                                                          |                                                                                                     |          |         |       |
|--------|----------------------------------------------------------------|----------------------------------------------------------|-----------------------------------------------------------------------------------------------------|----------|---------|-------|
| DHAD1  | dihydroxy acid dehydratase<br>2 3 dihydroxy 3 methylbutanoate  | 23dhmb[c] -> 3mob[c] + h2o[c]                            | TTE0020                                                                                             | 4.2.1.9  | TTE0020 | iTRAQ |
| DHAD2  | Dihydroxy acid dehydratase<br>2 3 dihydroxy 3 methylpentanoate | 23dhmp[c] -> 3mop[c] + h2o[c]                            | TTE0020                                                                                             | 4.2.1.9  | TTE0020 | iTRAQ |
| TRPAS2 | Tryptophanase L tryptophan<br>acetohydroxy acid                | h2o[c] + trp_L[c] <=> indole[c] + nh4[c] + pyr[c]        | TTE1602                                                                                             | 4.1.99.1 | TTE1602 | iTRAQ |
| KARA1i | isomeroreductase                                               | alac_S[c] + h[c] + nadph[c] -> 23dhmb[c] + nadp[c]       | TTE0015                                                                                             | 1.1.1.86 | TTE0015 | iTRAQ |
| KARA2i | ketol acid reductoisomerase<br>2 Aceto 2 hydroxybutanoate      | 2ahbut[c] + h[c] + nadph[c] -> 23dhmp[c] + nadp[c]       | TTE0015                                                                                             | 1.1.1.86 | TTE0015 | iTRAQ |
| IPPS   | 2 isopropylmalate synthase                                     | 3mob[c] + accoa[c] + h2o[c] -> 3c3hmp[c] + coa[c] + h[c] | TTE0016                                                                                             | 2.3.3.13 | TTE0016 | iTRAQ |
| CMS    | citramalate synthase                                           | pyr[c] + accoa[c] + h2o[c] -> coa[c] + citm[c] + h[c]    | TTE0016                                                                                             | 2.3.3.13 | TTE0016 | iTRAQ |
| NDPK1  | nucleoside diphosphate<br>kinase ATPGDP                        | atp[c] + gdp[c] <=> adp[c] + gtp[c]                      | TTE0747                                                                                             | 2.7.4.6  | TTE0747 | iTRAQ |
| NDPK3  | nucleoside diphosphate<br>kinase ATPCDP                        | atp[c] + cdp[c] <=> adp[c] + ctp[c]                      | TTE0747                                                                                             | 2.7.4.6  | TTE0747 | iTRAQ |
| ATPS4  | ATP synthase four protons<br>for one ATP                       | adp[c] + 4 h[e] + pi[c] -> atp[c] + h2o[c] + 3 h[c]      | (TTE0630 and TTE0631 and TTE0633<br>and TTE0634 and TTE0635 and<br>TTE0636 and TTE0637 and TTE0638) | 3.6.3.14 | TTE0637 | iTRAQ |
| ALAR   | alanine racemase                                               | ala_L[c] <=> ala_D[c]                                    | (TTE1207 or TTE2168)                                                                                | 5.1.1.1  | TTE2168 | iTRAQ |
| DHPS2  | dihydropteroate synthase                                       | 4abz[c] + 6hmhptpp[c] -> dhpt[c] + h[c] + ppi[c]         | TTE2370                                                                                             | 2.5.1.15 | TTE2370 | iTRAQ |
| ASPK   | aspartate kinase                                               | asp_L[c] + atp[c] <=> 4pasp[c] + adp[c]                  | TTE1382                                                                                             | 2.7.2.4  | TTE1382 | iTRAQ |
