# Supplementary material for: Robustness analysis of a constraint-based metabolic model links cell growth and proteomics of Thermoanaerobacter tengcongensis under temperature perturbation
Source: Royal Society of Chemistry journal article supplement (doi:10.1039/c3mb25278g), 2013-01-18
Supplement: c3mb25278g_2.pdf [file c3mb25278g_2.pdf]

File Name : SuppleFig1.tif

Caption : Supplemental Fig. 1 GO functional classification for differential proteins of *T. tengcongensis* between 75 and 55 °C

File Name : SuppleFig2.tif

Caption : Supplemental Fig. 2 The change trend prediction of bacterial growth for reactions beyond central metabolism

File Name : SuppleFig3.tif

Caption : The modeling of the secretion of acetate and ethanol and the glucose consumption during *T. tengcongensis* growth.

Abbreviations: ace-acetate, etoh-ethanol, glc-glucose.
